# Supplementary material for: Efficacy of artemether–lumefantrine, artesunate–amodiaquine, and dihydroartemisinin–piperaquine for treatment of uncomplicated Plasmodium falciparum malaria in Angola, 2015
Source: Springer Nature journal article supplement (doi:10.1186/s12936-017-1712-4), 2017-02-02
Supplement: MOESM1 [file 12043644]

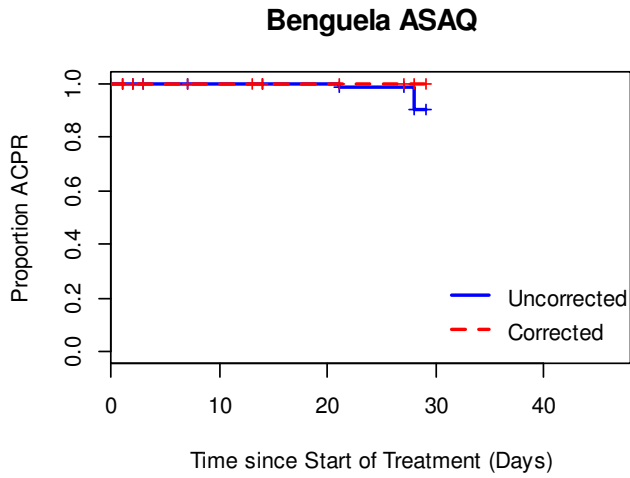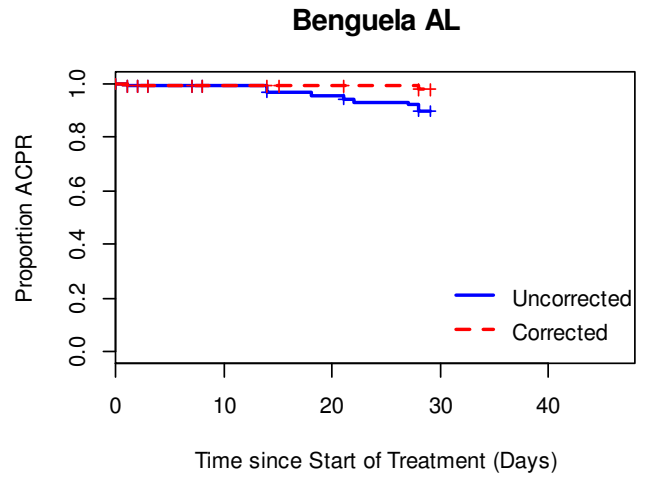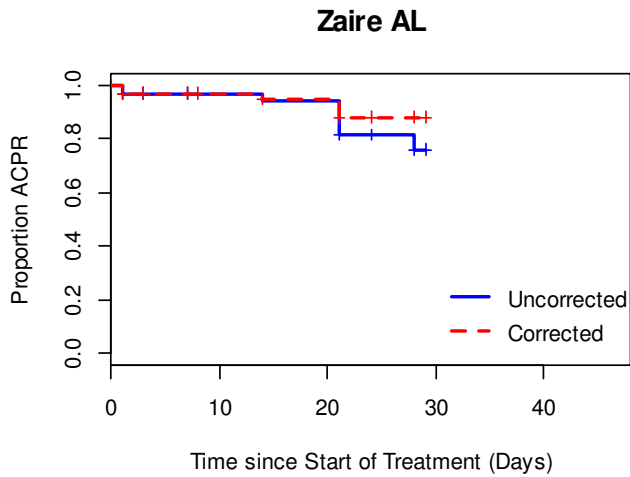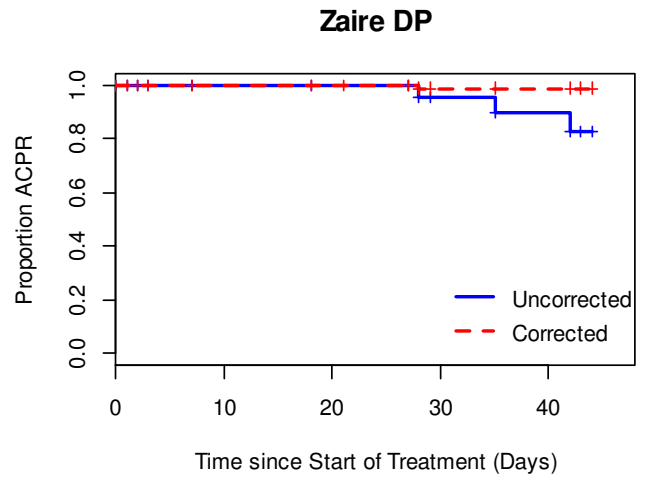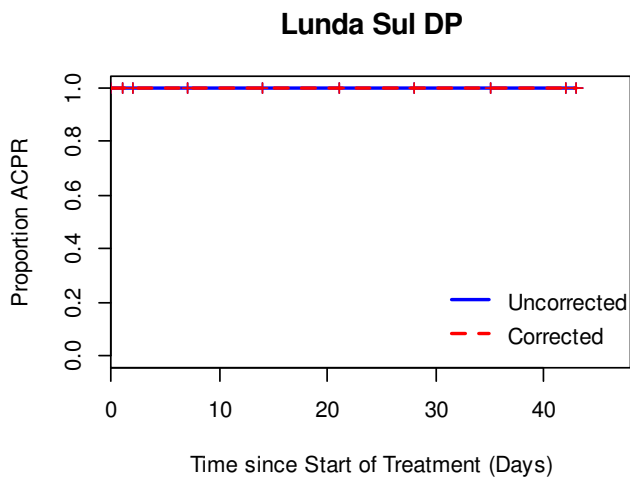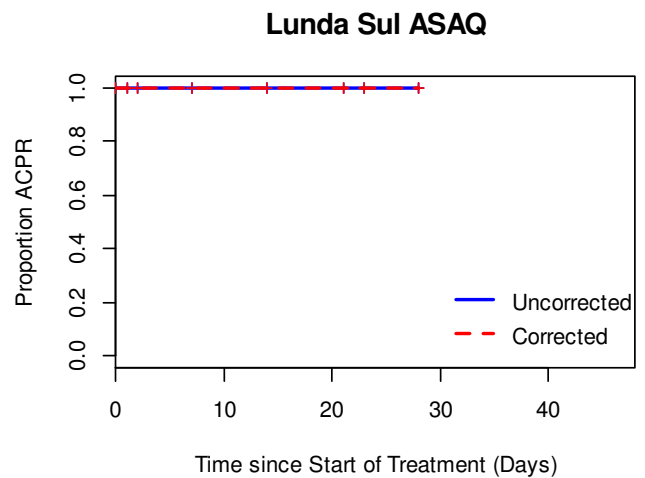

**Supplementary Figure S1.** Kaplan-Meier estimates of the proportion of participants with adequate clinical and parasitological response (ACPR) over the course of follow up during therapeutic efficacy monitoring in Angola, 2015. AL: Artemether-lumefantrine, ASAQ: Artesunate-amodiaquine, DP: Dihydroartemisinin-piperaquine
