# Supplementary material for: Efficacy of artemether–lumefantrine, artesunate–amodiaquine, and dihydroartemisinin–piperaquine for treatment of uncomplicated Plasmodium falciparum malaria in Angola, 2015
Source: Springer Nature journal article supplement (doi:10.1186/s12936-017-1712-4), 2017-02-02
Supplement: MOESM2 [file 12043644]

|                            |      |           |         |         |         |         |         |       |         |         |         |         |         |         |         |         |        |
|----------------------------|------|-----------|---------|---------|---------|---------|---------|-------|---------|---------|---------|---------|---------|---------|---------|---------|--------|
| Zaire                      | AL   | ZL378_D0  | 225.1   |         | 139.5   |         | 169.4   | 172.4 |         | 139.4   |         | 168.4   |         | 80.4    | 83.6    | 0.99    |        |
| Zaire                      | AL   | ZL378_D21 | 227.91  |         | 138.813 |         | 172.452 |       |         | 139.269 |         | 169     |         | 80.18   |         |         |        |
| Zaire                      | AL   | ZL379_D0  | 252.7   | 220     | 124.4   | 142     |         |       | 175.7   |         | 145.6   |         | 158.6   |         | 83.5    | 0.94    |        |
| Zaire                      | AL   | ZL379_D21 | 253.265 |         | 143.097 |         |         |       | 175.456 |         | 142.207 | 144.452 |         | 159.209 | 83.145  |         |        |
| Zaire                      | AL   | ZL383_D0  | 225.9   |         | 124.2   |         |         |       | 166.1   |         | 161.2   |         | 167.8   |         | 83.5    | 0.00    |        |
| Zaire                      | AL   | ZL383_D21 | 210.104 |         | 138.917 |         |         |       | 160.218 |         | 163.451 |         | 164.291 |         | 83.237  |         |        |
| Zaire                      | AL   | ZL384_D0  | 232.2   | 248.7   | 139.9   |         |         |       | 162.1   | 165.3   |         | 158.1   | 173.8   |         | 83.5    | 0.99    |        |
| Zaire                      | AL   | ZL384_D21 | 232.403 |         | 152.959 |         |         |       | 166.235 |         | 172.837 |         | 186.516 |         | 82.358  |         |        |
| Zaire                      | AL   | ZL386_D0  | 226.1   |         | 136.8   | 145     |         |       | 174.5   | 178.5   | 189.7   | 144.6   | 157.2   |         | 77.1    | 83.5    | 0.00   |
| Zaire                      | AL   | ZL386_D28 | 261.349 |         | 149.277 |         |         |       | 175.202 |         | 140.951 |         | 161.456 |         | 80.064  |         |        |
| Zaire                      | AL   | ZL391_D0  | 232.2   |         | 146.1   |         |         |       | 164.5   |         | 145.4   |         | 159.8   | 172     |         | 83.7    | 0.01   |
| Zaire                      | AL   | ZL391_D21 | 254.891 |         | 124.026 | 144.555 |         |       | 171.4   |         | 163.289 |         | 187.172 |         | 82.36   |         |        |
| Zaire                      | AL   | ZL398_D0  | 240.3   |         | 164.7   |         |         |       | 177.5   |         | 167.7   |         | 172.1   |         | 83.5    | 0.00    |        |
| Zaire                      | AL   | ZL398_D28 | 226.684 |         | 132.722 |         |         |       | 184.609 |         | 151.786 |         | 178.272 |         | 83.3    |         |        |
| <b>Treatment Successes</b> |      |           |         |         |         |         |         |       |         |         |         |         |         |         |         |         |        |
| Benguela                   | AL   | BL182_D0  | 219.652 |         | 145.2   |         |         |       | 163.411 |         | 173.992 |         | 180.576 |         | 80.404  |         |        |
| Benguela                   | AL   | BL189_D0  | 246.568 |         | 124.324 |         |         |       | 177.415 |         | 144.581 |         | 162.782 |         | 83.424  |         |        |
| Benguela                   | AL   | BL205_D0  | 255.068 |         | 141.896 |         |         |       | 201.881 |         | 158.195 |         | 165.965 |         | 73.765  |         |        |
| Benguela                   | AL   | BL211_D0  | 224.042 |         | 123     |         |         |       | 175.21  |         | 150.787 |         | 172.175 |         | 73.614  |         |        |
| Benguela                   | AL   | BL219_D0  | 247     |         | 141     |         |         |       | 168.3   | 203     |         | 157.7   |         | 166     |         | 73.9    | 80.4   |
| Benguela                   | AL   | BL228_D0  | 228.191 |         | 171.052 |         |         |       | 159.325 |         | 154.857 |         | 162.094 |         | 83.521  |         |        |
| Benguela                   | AL   | BL247_D0  | 217.45  |         | 147.044 |         |         |       | 168.289 |         | 158.152 |         | 171.471 |         | 83.489  |         |        |
| Benguela                   | ASAQ | BQ601_D0  | 263.328 |         | 123.311 |         |         |       | 180.7   |         | 154.045 |         | 171.359 |         | 82.588  |         |        |
| Benguela                   | ASAQ | BQ625_D0  | 263.104 |         | 145.065 |         |         |       | 180.574 |         | 138.172 |         | 144.7   |         | 80.385  |         |        |
| Benguela                   | ASAQ | BQ652_D0  | 223.975 | 246.463 | 136.702 |         |         |       | 171.326 |         | 160.591 | 167.705 |         | 168.9   |         | 82.567  |        |
| Benguela                   | ASAQ | BQ684_D0  | 211.735 | 232.258 | 124.327 | 141.908 |         |       | 168.381 |         | 158.175 |         | 162.201 | 195.955 |         | 73.828  |        |
| Lunda Sul                  | DP   | LD453_D0  | 223.929 |         | 142.952 |         |         |       | 168.266 |         | 157.956 |         | 165.872 |         | 83.503  |         |        |
| Lunda Sul                  | DP   | LD466_D0  | 219.81  | 249.9   | 138.814 |         |         |       | 165.255 | 171.383 |         | 148.684 | 164.509 |         | 162.825 | 168.387 | 80.264 |
| Lunda Sul                  | DP   | LD467_D0  | 246.829 |         | 145.248 |         |         |       | 172.379 |         | 153.983 |         | 171.708 | 174.569 |         | 83.604  |        |
| Lunda Sul                  | DP   | LD469_D0  | 230.27  |         | 136.806 |         |         |       | 174.415 |         | 183.37  |         | 162.211 |         | 80.299  |         |        |
| Lunda Sul                  | DP   | LD471_D0  | 253.113 |         | 141.032 |         |         |       | 169.091 |         | 177.122 |         | 162.952 |         | 83.588  |         |        |
| Lunda Sul                  | DP   | LD476_D0  | 236.436 |         | 124.314 |         |         |       | 165.279 |         | 170.678 |         | 193.016 |         | 80.264  |         |        |
| Lunda Sul                  | DP   | LD482_D0  | 221.688 |         | 142.945 |         |         |       | 165.274 | 177.519 |         | 158.322 |         | 180.458 |         | 80.276  |        |
| Lunda Sul                  | DP   | LD486_D0  | 224.071 | 246.764 | 124.345 | 142.99  |         |       | 171.432 |         | 164.453 |         | 159.326 | 189.81  |         | 73.809  |        |
| Lunda Sul                  | DP   | LD494_D0  | 223.95  |         | 124.357 | 143.008 |         |       | 165.237 |         | 164.418 | 183.311 |         | 172.001 |         | 83.403  |        |
| Lunda Sul                  | DP   | LD502_D0  | 219.947 | 248.809 | 147.037 |         |         |       | 165.273 | 183.624 |         | 150.926 | 164.538 |         | 171.463 | 186.765 | 80.291 |
| Lunda Sul                  | DP   | LD513_D0  | 248.695 |         | 139.797 |         |         |       | 160.139 |         | 158.136 |         | 162.143 |         | 80.197  |         |        |
| Lunda Sul                  | DP   | LD523_D0  | 252.967 |         | 125.292 |         |         |       | 169.334 |         | 170.622 |         | 162.138 |         | 83.549  |         |        |
| Lunda Sul                  | DP   | LD526_D0  | 219.84  | 236.378 | 157.423 |         |         |       | 165.247 | 174.428 |         | 173.814 |         | 174.573 |         | 83.457  |        |
| Lunda Sul                  | DP   | LD534_D0  | 223.884 |         | 132.595 |         |         |       | 165.243 | 189.888 |         | 138.333 | 147.825 |         | 189.228 | 196.443 | 83.439 |
| Lunda Sul                  | DP   | LD540_D0  | 231.4   |         | 145.2   |         |         |       | 166.5   |         | 157.1   |         | 166.1   |         | 83.6    |         |        |
| Lunda Sul                  | DP   | LD553_D0  | 211.474 |         | 143.008 |         |         |       | 177.077 |         | 154.969 |         | 169.034 |         |         |         |        |
| Zaire                      | DP   | ZD034_D0  | 213.656 | 230.111 | 147.118 |         |         |       | 159.123 | 166.205 |         | 151.848 | 176.936 |         | 168.938 | 189.594 | 83.501 |
| Zaire                      | DP   | ZD051_D0  | 222.938 | 231.257 | 124.32  |         |         |       | 159.08  |         | 154.991 |         | 168.814 |         | 80.283  |         |        |
| Zaire                      | DP   | ZD090_D0  | 232.244 |         | 138.85  |         |         |       | 174.356 |         | 157.219 |         | 186.332 |         | 83.492  |         |        |
| Zaire                      | AL   | ZL333_D0  | 240.617 |         | 138.618 |         |         |       | 165.543 |         | 179.24  |         | 168.247 |         | 70.42   |         |        |
| Zaire                      | AL   | ZL377_D0  | 228.141 |         | 137.875 |         |         |       | 177.524 | 183.645 |         | 142.53  | 154.055 |         | 156.373 |         | 80.302 |
| Zaire                      | AL   | ZL328_D0  | 229.1   |         | 123.5   |         |         |       | 184.7   |         | 161.1   |         | 161.4   |         | 83.5    |         |        |
| Zaire                      | AL   | ZL355_D0  | 267.3   |         | 123.3   |         |         |       | 163     |         | 170.7   |         | 181.4   |         | 83.5    |         |        |
| Zaire                      | AL   | ZL404_D0  | 219.9   |         | 145.1   |         |         |       | 171.4   |         | 144.6   |         | 174.6   |         | 83.6    |         |        |
